# Supplementary figures and images for: Principles of Genome Evolution in the Drosophila melanogaster Species Group
Source: PLOS journal article supplement (doi:10.1371/journal.pbio.0050152), 2007-06-01

**A**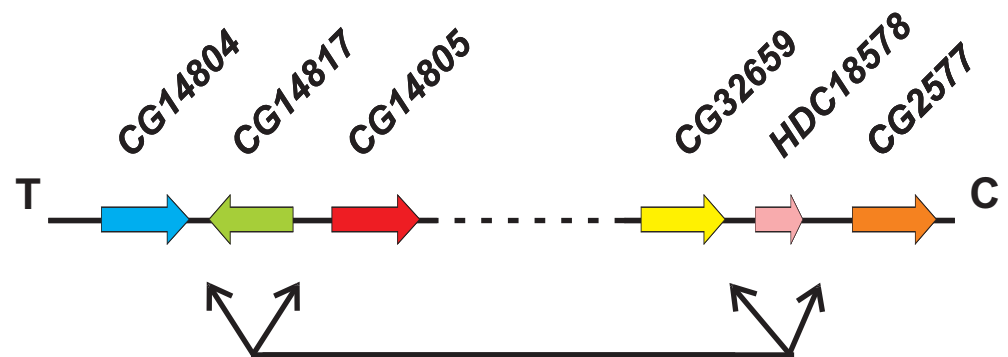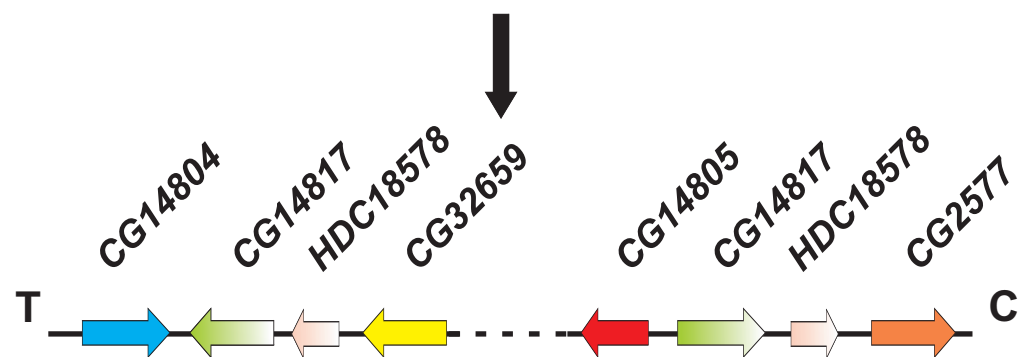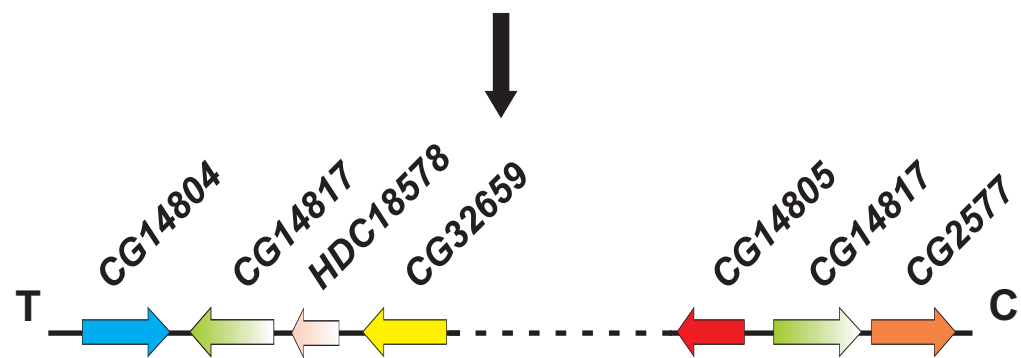**B**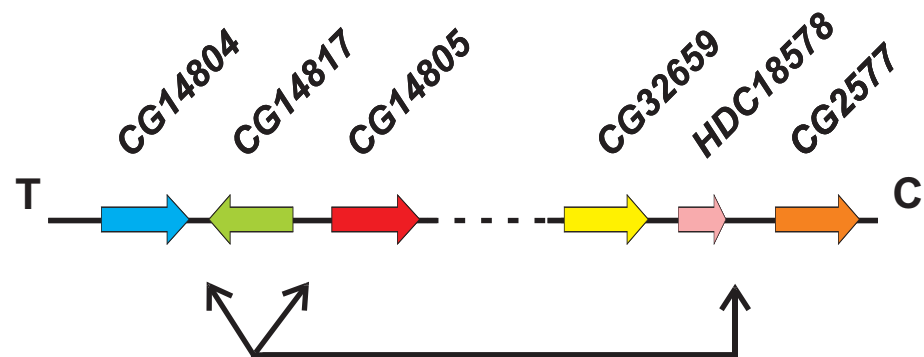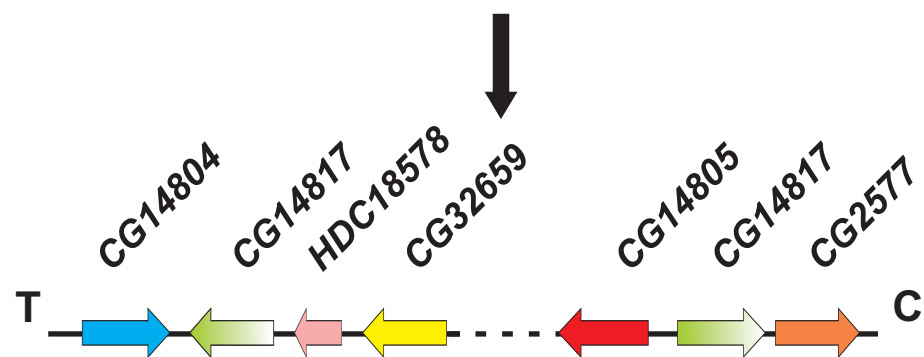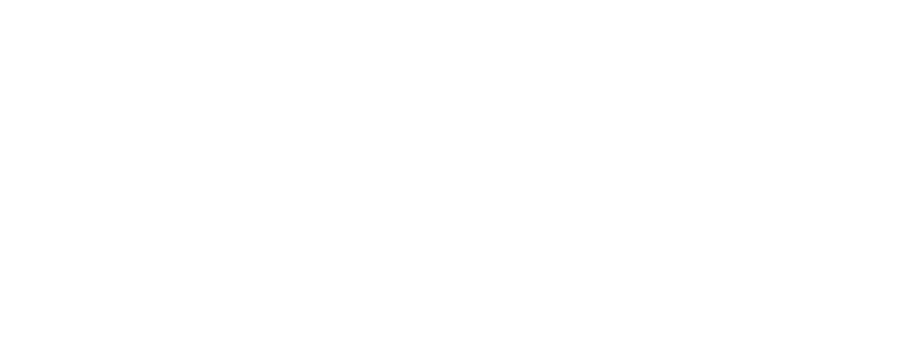

Supplement: S5 (10.1371/journal.pbio.0050152.s005) [file journal.pbio.0050152.s005]

*D. yakuba*

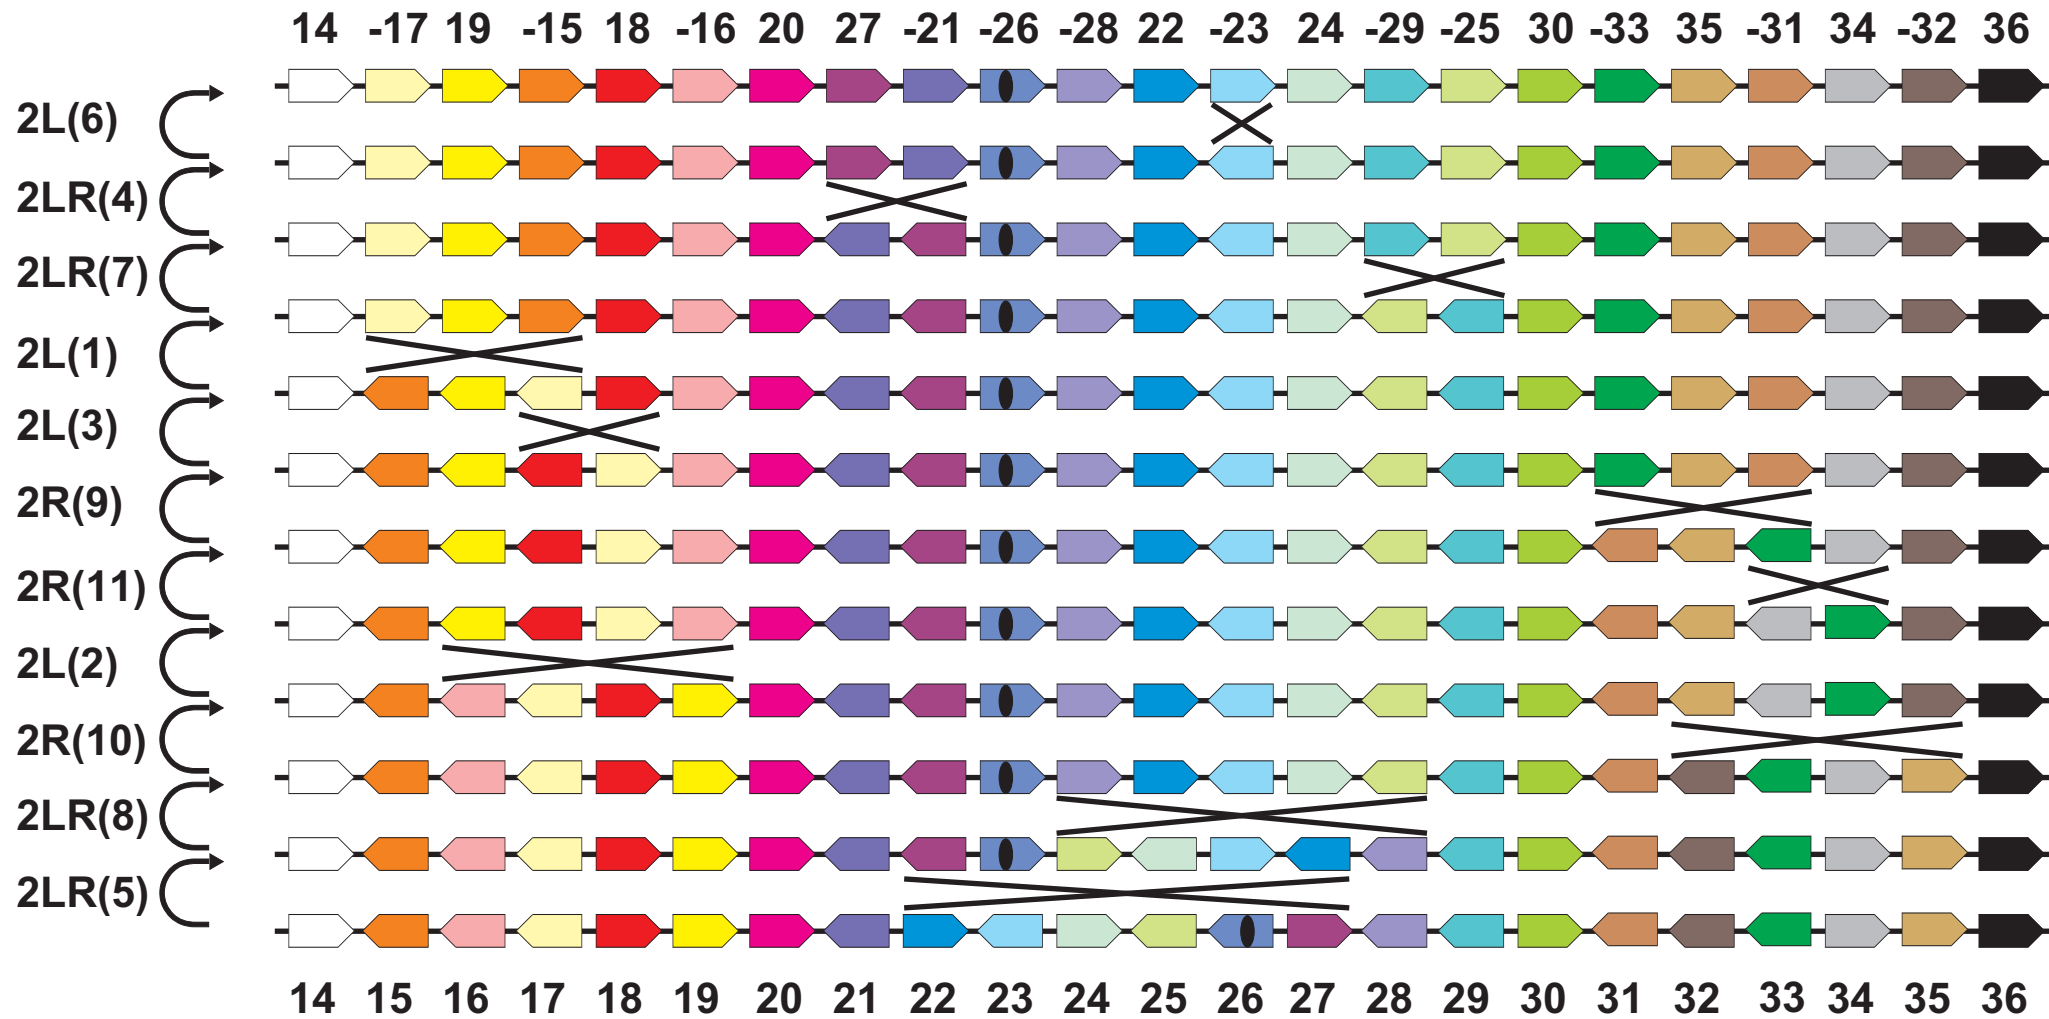

*D. melanogaster*

Supplement: S6 (10.1371/journal.pbio.0050152.s006) [file journal.pbio.0050152.s006]
